# Supplementary material for: An Sfi1-like centrin-interacting centriolar plaque protein affects nuclear microtubule homeostasis
Source: PubMed Central journal article supplement (PMC10180636; doi:10.1371/journal.ppat.1011325), 2023-05-02
Supplement: ppat.1011325.s010.pdf [file ppat.1011325.s010.pdf]

| Gene ID              | Identified Proteins                        | M.W.           | Peptide count | GFP control pull down (Balestra et al. 2021) [1] |
|----------------------|--------------------------------------------|----------------|---------------|--------------------------------------------------|
| <b>PF3D7_0107000</b> | <b>Centrin-1</b>                           | <b>20 kDa</b>  | <b>24</b>     | <b>not identified in GFP control</b>             |
| PF3D7_1357000        | Elongation factor 1-alpha                  | 49 kDa         | 5             | identified in GFP control                        |
| PF3D7_1462800        | Glyceraldehyde-3-phosphate dehydrogenase   | 37 kDa         | 5             | identified in GFP control                        |
| PF3D7_0818900        | Cluster of Heat shock protein 70           | 74 kDa         | 5             | identified in GFP control                        |
| <b>PF3D7_1027700</b> | <b>Centrin-3</b>                           | <b>21 kDa</b>  | <b>4</b>      | <b>not identified in GFP control</b>             |
| PF3D7_1117700        | GTP-binding nuclear protein                | 25 kDa         | 3             | identified in GFP control                        |
| <b>PF3D7_0710000</b> | <b>Conserved protein, unknown function</b> | <b>407 kDa</b> | <b>3</b>      | <b>not identified in GFP control</b>             |
| PF3D7_0610400        | Histone H3                                 | 15 kDa         | 2             | identified in GFP control                        |
| PF3D7_0719600        | 60S ribosomal protein L11a, putative       | 20 kDa         | 2             | identified in GFP control                        |
| PF3D7_0708400        | Heat shock protein 90                      | 86 kDa         | 2             | identified in GFP control                        |
| PF3D7_1116800        | Heat shock protein 101                     | 103 kDa        | 2             | identified in GFP control                        |

**S1 Table. Mass spectrometry analysis of Centrin Co-IP reveals two specific interaction partners.** All proteins identified from the non-crosslinked PfCentrin1-GFP co-immunoprecipitation samples are listed with peptide counts. Only Centrin-1, Centrin-3, and PfSlp (highlighted in green) were not detectable in a GFP only control pull down done with the same protocol used in a previous study by Balestra et al. 2021 [1].

#### Reference

1. Balestra AC, Koussis K, Klages N, Howell SA, Flynn HR, Bantscheff M, et al. Ca<sup>2+</sup> signals critical for egress and gametogenesis in malaria parasites depend on a multipass membrane protein that interacts with PKG. *Sci Adv.* 2021;7: eabe5396. doi:10.1126/sciadv.abe5396.
