# Supplementary material for: An Sfi1-like centrin-interacting centriolar plaque protein affects nuclear microtubule homeostasis
Source: PubMed Central journal article supplement (PMC10180636; doi:10.1371/journal.ppat.1011325), 2023-05-02
Supplement: ppat.1011325.s011.pdf [file ppat.1011325.s011.pdf]

| <b>Primer designation</b>   | <b>Sequence</b>             |
|-----------------------------|-----------------------------|
| 1: SIp cDNA fw 1            | GAAGACGATGTTGAGGAGGGG       |
| 2: SIp cDNA rev 1           | TCGTCGTTATGGACATCCTCT       |
| 3: SIp cDNA fw 2            | AGGTGAAAGTATAAGCGGTCAGG     |
| 4: SIp cDNA rev 2           | CCCCTCCTCAACATCGTCTT        |
| 5: Serine tRNA ligase fw    | AAGTAGCAGGTCATCGTGGTT       |
| 6: Serine tRNA ligase rev   | TTCGGCACATTCTTCCATAA        |
| 7: gDNA 5' integration fw   | CACCACATCTTCATAACTCTTCAGG   |
| 8: gDNA 5' integration rev  | GCATCACCTTCACCCTCTCC        |
| 9: gDNA 3' int fw           | GAGCGGATAACAATTTAC          |
| 10: gDNA 3' int rev         | CAAAACATGTTTACATTATTGACAAGG |
| 7: gDNA original locus fw   | CACCACATCTTCATAACTCTTCAGG   |
| 10: gDNA original locus rev | CAAAACATGTTTACATTATTGACAAGG |

**S2 Table. List of primers used in this study.**
