# Supplementary material for: An Sfi1-like centrin-interacting centriolar plaque protein affects nuclear microtubule homeostasis
Source: PubMed Central journal article supplement (PMC10180636; doi:10.1371/journal.ppat.1011325), 2023-05-02
Supplement: ppat.1011325.s012.pdf [file ppat.1011325.s012.pdf]

| <b>Antibody</b>                         | <b>Species</b> | <b>Dilution</b>       | <b>Source</b>      |
|-----------------------------------------|----------------|-----------------------|--------------------|
| anti-alpha-tubulin B-5-1-2, monoclonal  | mouse          | 1:500                 | Sigma              |
| Anti-tubulin [YOL1/34]                  | rat            | 1:200                 | Abcam              |
| anti-PfCentrin3, polyclonal             | rabbit         | 1:500 (1:1000 for WB) | Simon et al., 2021 |
| Anti-GFP 3E6, monoclonal                | mouse          | 1:200                 | Thermo             |
| Anti-EGFP [F56-6A1.2.3]                 | mouse          | 1:50                  | Abcam              |
| Anti GFP (11814460001, Western blot)    | mouse          | 1:2000                | Roche              |
| HRP Anti- PfAldolase antibody (ab38905) | rabbit         | 1:1000                | Abcam              |
| anti-rat-Alexa 488                      | Goat           | 1:1000*               | Sigma              |
| anti-mouse-Alexa 568                    | Goat           | 1:1000                | Sigma              |
| anti-mouse-Atto647                      | Goat           | 1:1000*               | Sigma              |
| anti-rabbit-Atto594                     | Goat           | 1:1000*               | Sigma              |
| anti-rabbit-Atto647                     | Goat           | 1:1000                | Sigma              |
| Anti-mouse IgGHRP (A5278)               | Goat           | 1:3000                | Sigma              |
| IRDye 800CW anti-Mouse IgG (H + L)      | Goat           | 1:10.000              | LI-COR             |
| IRDye 680RD anti-Rabbit IgG (H + L)     | Goat           | 1:10.000              | LI-COR             |
| IRDye 800CW anti-Rabbit IgG (H + L)     | Goat           | 1:10.000              | LI-COR             |
| <b>Dye</b>                              |                | <b>Dilution</b>       | <b>Source</b>      |
| SPY555-Tubulin (SC203)                  | -              | 1:2000                | Spirochrome        |
| 5-SiR-Hoechst                           | -              | 20 nM                 | G. Lukinavicius    |
| Hoechst33342                            | -              | 1:1000                | Thermo             |

**S3 Table. Antibodies and dyes used in this study.** Starred (\*) indicates dilutions for IFAs imaged by confocal microscopy; for STED, those antibodies were used at 1:200.

### Reference

1. Simon CS, Funaya C, Bauer J, Voß Y, Machado M, Penning A, et al. An extended DNA-free intranuclear compartment organizes centrosome microtubules in malaria parasites. *Life Sci Alliance*. 2021;4: e202101199. doi:10.26508/lsa.202101199
